# 1 Impact of Meteorological factors on wheat growth period and 2 irrigation water requirement —A case study of the Beijing- 3 Tianjin-Hebei region in China

4 \* Chengcheng Xu <sup>1,2</sup>, Chuiyu Lu <sup>2</sup>, Jianhua Wang <sup>2</sup>

5 (1. School of Earth and Environment, Anhui University of Science and Technology, Huainan: 232001, China;

6 2. State Key Laboratory of Water Cycle Simulation and Regulation, China Institute of Water Resources and

7 Hydropower Research, Beijing: 100038, China)

8 Corresponding Author: Chengcheng Xu, Email address: 1647203047@qq.com

9 **Abstract:** This study analyzes the irrigation water requirement of wheat in the growth stage in the  
10 Beijing-Tianjin-Hebei region under the changes of meteorological factors conditions, using the  
11 growth period data, and meteorological data from 80 meteorological stations, from 2000 to 2019.  
12 The results show that: (1) The annual average precipitation, average wind speed, and average  
13 relative humidity of the growth period in the Beijing-Tianjin-Hebei region show a downward  
14 variation trend, while the temperature variation shows an upward trend. Moreover, relative humidity  
15 and radiation exhibit a negative spatial correlation. (2) Wheat irrigation water requirement in the  
16 Beijing-Tianjin-Hebei region gradually decreases from north to south and east to west. However,  
17 the eastern region shows a gradually increasing trend, while the western region shows a decreasing  
18 trend. (3) Meteorological factors are negatively correlated with irrigation water requirement,  
19 potential evapotranspiration, effective precipitation, and relative humidity, and significantly  
20 positively correlated with sunshine hours, average temperature, and wind speed. The overall  
21 variation in irrigation water requirement has the highest correlation with potential  
22 evapotranspiration. However, the yearly variations in regional irrigation water requirement are  
23 dependent on factors such as wind speed, relative humidity, and radiation.

24 **Keywords:** wheat growth period; meteorological factors; irrigation water requirement; China.

## 25 1. Introduction

26 The United Nations defines climate change as the variation in the Earth's atmospheric  
27 composition from direct or indirect human activities, in addition to the natural variability of climate  
28 observed during similar periods. The impact of climate change on the human environment has

29 increased progressively and extensively (Seo et al., 2013; Ju et al., 2013; Calzadilla et al., 2013;  
30 Noufé et al., 2015), and since the First World Climate Conference in 1979, climate change research  
31 has gradually attracted global attention (Iglesias, 2012; Ahmad et al., 2019; Mayank et al., 2019;  
32 Pons et al., 2020). The World Meteorological Organization (WMO) and the United Nations  
33 Environment Programme (UNEP) are two major organizations dealing with climate change, that  
34 simultaneously established the Intergovernmental Panel on Climate Change (IPCC) (Van der and  
35 Warner, 2020). The various assessment reports put forward by the IPCC since 1990 have established  
36 a scientific basis for climate change research, by indicating that global warming was caused by both  
37 natural and manmade factors. The global temperature reportedly rose by 0.3-0.6 °C in a century.  
38 Furthermore, the elevation in global average temperature since the mid-20th century was primarily  
39 attributed to greenhouse gases emitted through human activities. The global climate change since  
40 the past 132 years (1880-2012) was also elaborated. Moreover, the IPCC 2013 report predicts the  
41 trend of climate change at the end of the 21st century through a variety of scenario models:

42 Temperature rise varies regionally, and it will be higher on the land than the sea by 1.4-1.7 °C, with  
43 the Arctic recording the highest temperature (McBride et al., 2020). Extreme hot weather events  
44 will increase, and the duration will be lengthened in most areas, and extreme cold weather events  
45 will decrease. The frequency of high temperature events will double every two decades. Increased  
46 precipitation will occur mostly in high latitudes and some in mid latitudes, instead of the subtropics.  
47 Precipitation will increase with the rise in global warming, and the rate of increase in precipitation  
48 for a unit temperature rise is less than that of water vapor. Precipitation will show high spatial  
49 variations, further increasing the precipitation gap between arid and humid regions (Weerathunga  
50 et al., 2020), and in most parts of the world, between wet and dry seasons. In addition, precipitation  
51 will increase in the equatorial Pacific, high latitude and humid mid-latitude regions and decrease in  
52 subtropical and arid mid-latitude regions.

53 The agriculture industry is most vulnerable to the effects of climate change (Sun et al., 2013;  
54 Schönhart et al., 2016; Liu et al., 2016). Therefore, the impact of climate change on agricultural  
55 production is a relevant issue in climate change research (Dong et al., 2019). Climate change in  
56 China follows a similar trend as the overall global climate change, with slight variations (Lv et al.,  
57 2013; Zhang et al., 2016). The North China plain is one of the principal wheat producing areas in

58 China. Climate change inevitably impacts the growth period and water requirement of wheat,  
59 thereby affecting its yield and quality (Chen et al., 2013; Wang et al., 2014; Geng et al., 2019; Wang  
60 et al., 2019). Thus, the study of regional changes in irrigation water requirement for wheat in the  
61 Beijing-Tianjin-Hebei region is significant in relation to the overall temperature rise in North China.  
62 Furthermore, the factors affecting wheat irrigation water requirement have also been investigated.

## 63 **2. Materials and methods**

### 64 **2.1 Overview of the study area**

65 The Beijing-Tianjin-Hebei region (total area of 216,500 km<sup>2</sup>), is the “capital economic circle”  
66 of China and accounts for 2.3% of the total area of the country. In addition to Beijing and Tianjin,  
67 the region comprises Baoding, Langfang, Shijiazhuang, Tangshan, Handan, Qinhuangdao, 11  
68 prefecture-level cities including Zhangjiakou, Chengde, Cangzhou, Xingtai, and Hengshui, and 2  
69 provincial-level cities directly under the control of Dingzhou and Xinji, of the Hebei province. The  
70 Taihang Mountains lie to the west, and the Bohai Bay to the east of the Beijing-Tianjin-Hebei region.  
71 The terrain is high in the northwest and north, and flat in the south and east (Zhang et al., 2020). In  
72 winter, the cold and snowless weather is controlled by the Siberian continental air mass, and  
73 northerly and northwestern winds prevail. Spring is affected by the Mongolian continental air mass,  
74 such that there is a rapid temperature rise, high wind speed (Guo et al., 2020), dry climate, and  
75 amount of evaporation. The weather tends to be dry, windy, and sandy (Guo et al., 2020). Summer  
76 is affected by oceanic air masses, and is humid, with high temperatures, and heavy rainfall (Song et  
77 al., 2020). However, the inconsistencies in time, intensity, and range of influence of the Pacific  
78 subtropical high every summer result in high rainfall variation and occasional droughts and floods.  
79 In autumn, the weather is high and the rainfall is low (Zhenyu et al., 2019; Men et al., 2020; Bi et  
80 al., 2020).

81 In the Beijing-Tianjin-Hebei region, 13 main single crops are cultivated, including wheat, corn,  
82 cotton, vegetables, potatoes, peanuts, millet, soybeans, forest fruits, and rice. Multiple cropping  
83 occupies a part of the region, and is observed primarily for wheat and corn, in addition to wheat and  
84 peanuts, soybeans and cotton, cotton and vegetables, and cotton and fruits. Other types of crops  
85 such as rape, flax, naked oats, and sorghum, are also cultivated in small areas. However, wheat and  
86 corn are the primary plantations occupying a large portion of the Beijing-Tianjin-Hebei region.

87

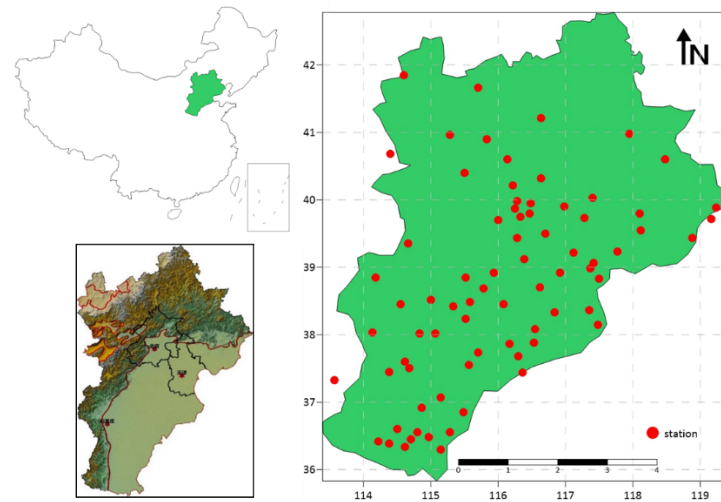

88

89 **Figure 1 (a) Map showing geographical location of the study area and (b) Map showing distribution of**  
90 **meteorological stations**

## 91 **2.2 Source of information**

92 The meteorological data were obtained from the National Meteorological Center of China.  
93 Daily meteorological data, including average temperature ( $^{\circ}\text{C}$ ), maximum temperature ( $^{\circ}\text{C}$ ),  
94 minimum temperature ( $^{\circ}\text{C}$ ), sunshine hours (h), precipitation (mm), wind speed (m/s), and average  
95 relative humidity (%) were selected from 80 representative ground weather stations from 2000 to  
96 2019. For unavailable meteorological data, the missing values of temperature (average, maximum,  
97 and minimum) and precipitation were interpolated using Kriging interpolation.

98 The growth period data for wheat was obtained from the Chengde, Tangshan, Zunhua, Baoding,  
99 Shijiazhuang, and Botou observation stations from 2000 to 2019. Since the growth period  
100 observation stations and ground weather stations (Beijing Station, Tianjin Station, Shijiazhuang  
101 Station, and Nangong Station) were not consistent, the nearest matching principle was adopted and  
102 80 sets of continuous 20-year observation data were selected, as shown in Table 1.

103

104

105

**Table 1 Data of Beijing-Tianjin-Hebei meteorological stations**

| NO. | name      | province | longitude | latitude | NO. | name         | province | longitude | latitude |
|-----|-----------|----------|-----------|----------|-----|--------------|----------|-----------|----------|
| 1   | Anguo     | Hebei    | 115.3330  | 38.4167  | 41  | Funing       | Hebei    | 119.2330  | 39.8833  |
| 2   | Anping    | Hebei    | 115.5170  | 38.2333  | 42  | Fucheng      | Hebei    | 116.1670  | 37.8667  |
| 3   | Anxin     | Hebei    | 115.9330  | 38.9167  | 43  | Fuping       | Hebei    | 114.1830  | 38.8500  |
| 4   | Anyang    | Hebei    | 114.1214  | 36.1427  | 44  | Gangzi       | Hebei    | 118.3119  | 42.5781  |
| 5   | Balihan   | Hebei    | 118.6415  | 41.5130  | 45  | Gaobeidian   | Hebei    | 115.8740  | 39.3266  |
| 6   | Bszhou    | Hebei    | 116.3833  | 39.1167  | 46  | Gaoyang      | Hebei    | 115.7830  | 38.6833  |
| 7   | Baixiang  | Hebei    | 114.6830  | 37.5000  | 47  | Gaoyi        | Hebei    | 114.6170  | 37.6000  |
| 8   | Baodi     | Tianjin  | 117.2830  | 39.7333  | 48  | Gaocheng     | Hebei    | 114.8330  | 38.0167  |
| 9   | Baoding   | Hebei    | 115.5167  | 38.8500  | 49  | Guyuan       | Hebei    | 115.7000  | 41.6667  |
| 10  | Beichenqu | Tianjin  | 117.1170  | 39.2167  | 50  | Guan         | Hebei    | 116.2830  | 39.4333  |
| 11  | Beijing   | Beijing  | 116.4667  | 39.8000  | 51  | Guantao      | Hebei    | 115.2830  | 36.5500  |
| 12  | Botou     | Hebei    | 116.5500  | 38.0833  | 52  | Guangping    | Hebei    | 114.9670  | 36.4833  |
| 13  | Cangzhou  | Hebei    | 116.8333  | 38.3333  | 53  | Guangzong    | Hebei    | 115.1500  | 37.0667  |
| 14  | Changli   | Hebei    | 119.1670  | 39.7167  | 54  | Haidian      | Beijing  | 116.2830  | 39.9833  |
| 15  | Changping | Beijing  | 116.2170  | 40.2167  | 55  | Haixing      | Hebei    | 117.4830  | 38.1500  |
| 16  | Chaoyang  | Beijing  | 116.4830  | 39.9500  | 56  | Handan       | Hebei    | 114.5000  | 36.6000  |
| 17  | Chengan   | Hebei    | 114.7000  | 36.4500  | 57  | Hanguqu      | Tianjin  | 117.7670  | 39.2333  |
| 18  | Chengde   | Hebei    | 117.9500  | 40.9833  | 58  | Xingtang     | Hebei    | 114.5500  | 38.4500  |
| 19  | Chicheng  | Hebei    | 115.8330  | 40.9000  | 59  | Linzhang     | Hebei    | 114.617   | 36.3333  |
| 20  | Congli    | Hebei    | 115.2830  | 40.9667  | 60  | Hejian       | Hebei    | 116.083   | 38.45    |
| 21  | Cixian    | Hebei    | 114.3830  | 36.3833  | 61  | Hengshui     | Hebei    | 115.7000  | 37.7333  |
| 22  | Dachang   | Hebei    | 116.9833  | 39.9000  | 62  | Huaiian      | Hebei    | 114.4000  | 40.6833  |
| 23  | Dacheng   | Hebei    | 116.6170  | 38.7000  | 63  | Huailai      | Hebei    | 115.5000  | 40.4000  |
| 24  | Dagangu   | Tianjin  | 117.5000  | 38.8333  | 64  | Huairou      | Beijing  | 116.6330  | 40.3167  |
| 25  | Daming    | Hebei    | 115.1500  | 36.3000  | 65  | Haungye      | Hebei    | 117.3500  | 38.3667  |
| 26  | Daxing    | Beijing  | 116.3330  | 39.7500  | 66  | Jize         | Hebei    | 114.8670  | 36.9167  |
| 27  | Dezhou    | Hebei    | 116.3590  | 37.4355  | 67  | Jixian       | Tianjin  | 117.4000  | 40.0333  |
| 28  | Dingzhou  | Hebei    | 115.0000  | 38.5167  | 68  | Jixian       | Hebei    | 115.5670  | 37.5500  |
| 29  | Dongguang | Hebei    | 116.5330  | 37.8833  | 69  | Jinqu        | Tianjin  | 117.3670  | 38.9833  |
| 30  | Dongli    | Tianjin  | 117.4170  | 39.0667  | 70  | Jinxian      | Hebei    | 115.0670  | 38.0167  |
| 31  | Duolun    | Hebei    | 116.4855  | 42.2035  | 71  | Jingjing     | Hebei    | 114.1330  | 38.0333  |
| 32  | Fangshan  | Beijing  | 116.0000  | 39.7000  | 72  | Shijiazhuang | Hebei    | 114.5418  | 38.0423  |
| 33  | Feixiang  | Hebei    | 114.8000  | 36.5500  | 73  | Tangshan     | Tianjin  | 118.1800  | 39.6300  |
| 34  | Fengnan   | Hebei    | 118.1170  | 39.5500  | 74  | Julu         | Hebei    | 115.0330  | 37.2167  |
| 35  | Fengning  | Hebei    | 116.6333  | 41.2167  | 75  | Kangbao      | Hebei    | 114.6000  | 41.8500  |
| 36  | Fengrun   | Hebei    | 118.1000  | 39.8000  | 76  | Kuancheng    | Hebei    | 118.4830  | 40.6000  |
| 37  | Fengtai   | Beijing  | 116.2500  | 39.8667  | 77  | Laiyuan      | Hebei    | 114.6670  | 39.3500  |
| 38  | Fengfeng  | Hebei    | 114.2170  | 36.4167  | 78  | Langfang     | Hebei    | 116.7000  | 39.5000  |
| 39  | Foyeding  | Beijing  | 116.1330  | 40.6000  | 79  | Yueting      | Hebei    | 118.8833  | 39.4333  |
| 40  | Lincheng  | Hebei    | 114.3830  | 37.4500  | 80  | Zunhua       | Hebei    | 117.9660  | 40.1892  |

106

107

108

109

110

111

This study divided the entire growth period of wheat into six stages: initial growth period, thawing period, wintering period, fast development period, middle growth period, and maturity period. The multi-year average of the development period was used as the local average growth period.

## 112 2.3 Calculation of potential evapotranspiration

113 Potential evapotranspiration ( $ET_0$ ) is the maximum evapotranspiration that a fixed underlying  
114 surface can reach when the water supply is not restricted by meteorological factors (Lecina et al.,  
115 2003). It determines the dry and wet conditions of the region, along with precipitation, and is a key  
116 factor for estimating the ecological water requirement and agricultural irrigation. Further, in the  
117 study, the characteristics of the crop are specified, by defining the evapotranspiration of a green  
118 grass canopy with the same height, moderate moisture, active growth, and complete coverage of the  
119 ground surface with a crop height of 0.12 m, a leaf resistance of 70 s/m, and a reflectivity of 0.23.

120  $ET_0$  is based on the daily values of average, maximum and, minimum temperatures, average  
121 wind speed, average humidity and sunshine hours. It is calculated using the Penman-Monteith  
122 method recommended by FAO (Allen et al., 1998):

$$123 \quad ET_0 = \frac{0.408\Delta(R_0 - G) + r \frac{900}{T + 273} u_2 (e_s - e_a)}{\Delta + (1 + 0.34u_2)} \quad (1)$$

124  
125 In the equation,  $R_0$  is the net radiation on the surface of the canopy ( $\text{MJ}/(\text{m}^2 \cdot \text{d})$ );  $G$  is the soil  
126 heat flux ( $\text{MJ}/(\text{m}^2 \cdot \text{d})$ );  $T$  is the average temperature ( $^{\circ}\text{C}$ );  $e_s$  is the saturated vapor pressure (kPa);  
127  $e_a$  is the actual vapor pressure (kPa);  $\Delta$  is the tangent slope of the saturated vapor pressure and  
128 temperature curve at  $T$  ( $\text{kPa}/^{\circ}\text{C}$ );  $r$  is the hygrometer constant ( $\text{kPa}/^{\circ}\text{C}$ );  $u_2$  is the wind speed at a  
129 height of 2 m (m/s).

## 130 2.4 Calculation of effective precipitation

131 Effective precipitation refers to the precipitation required to balance crop evapotranspiration  
132 during the growth period. It is related to the crop water requirement and yearly distribution of  
133 precipitation. There are differences in the amount of precipitation that specific crops can use for the  
134 same annual precipitation and distribution of different precipitation years, as shown in Figure 2. The  
135 crop water requirement that is not met by effective precipitation needs to be supplemented through  
136 irrigation, Hence, there is a correlation between effective precipitation and irrigation water  
137 requirement.

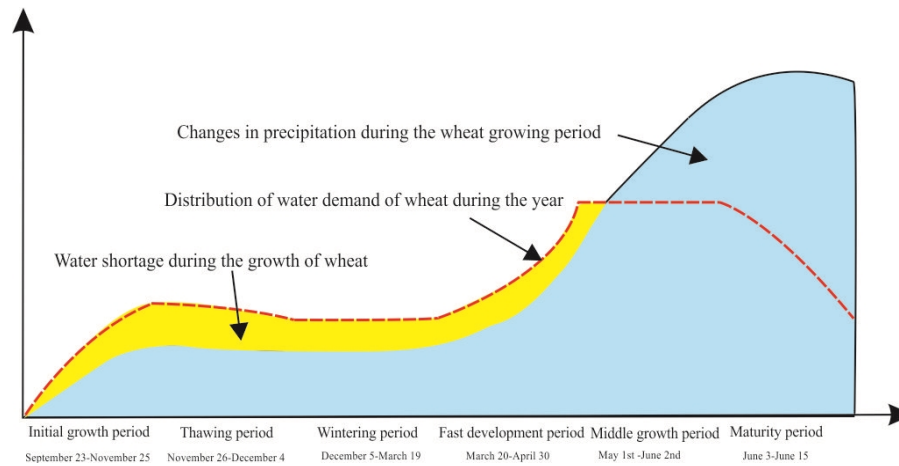

138

139

140 **Figure 2 Plot showing the relationship between water requirement and precipitation during wheat growth**

141

**period**

142 The crop water requirement is determined by the crop coefficient method as follows:

$$143 \quad ET_C = K_C ET_0 \quad (2)$$

144 In the formula,  $ET_C$  is the crop water requirement (mm/d);  $ET_0$  is the reference crop  
145 evapotranspiration (mm/d); and  $K_C$  is the crop coefficient.

146 The piecewise single-value average crop coefficient method recommended by the Food and  
147 Agriculture Organization (FAO), is adopted for  $K_C$ . Hence, the variation of  $K_C$  during the entire  
148 growth period is divided into 6 stages. The values of  $K_C$  are shown in Table 2.

149

**Table 2 Wheat crop coefficients for the study area**

| Wheat | Initial growth period        | Thawing period             | Wintering period        | Fast development period | Middle growth period | Maturity period |
|-------|------------------------------|----------------------------|-------------------------|-------------------------|----------------------|-----------------|
| Date  | September 23-<br>November 25 | November 26-<br>December 4 | December 5-<br>March 19 | March 20-<br>April 30   | May 1-<br>June 2     | June 3-June 15  |
| $K_C$ | 0.6                          | 0.6-0.4                    | 0.4                     | 0.4-1.15                | 1.15                 | 1.15-0.4        |

150 High precipitation occurring in a day may be stored in the soil and subsequently utilized by  
151 crops. Thus, effective precipitation can be statistically characterized over time. In this study, the  
152 water requirement and characteristics of crop growth every ten days are used for the statistical

153 calculation of effective precipitation as:

$$154 \quad \begin{cases} EP_{10d} = ET_C^{10d}, P_{10d} > ET_C^{10d} \\ EP_{10d} = P_{10d}, P_{10d} \leq ET_C^{10d} \end{cases} \quad (3)$$

155

156 where,  $EP_{10d}$  is the ten-day scale effective precipitation (mm/10 d);  $ET_C^{10d}$  is the ten-day crop  
157 water requirement (mm/10 d); and  $P_{10d}$  is the ten-day precipitation (mm/10 d).

158 The effective precipitation during the crop growth cycle is the sum of the effective precipitation  
159 on the ten-day scale:

$$160 \quad EP = \sum EP_{10d} \quad (4)$$

161

## 162 **2.5 Calculation of irrigation water requirement**

163 A portion of the water needed for agricultural production is obtained from precipitation, and  
164 the remaining portion from artificial irrigation. Precipitation is sufficient for crop growth during  
165 high-water period, but artificial irrigation is required during low-water period. Therefore, irrigation  
166 water requirement, effective precipitation during the crop growth and development stages, the actual  
167 area, and the amount of precipitation are closely related factors. Setting the effective precipitation  
168 as  $P_1$  and the actual regional precipitation as  $P_2$ , the irrigation water requirement,  $Q$  can be expressed  
169 as

$$170 \quad Q = P_2 - P_1 \quad (5)$$

## 171 **3. Result analysis**

### 172 **3.1 Analysis of climate change characteristics**

#### 173 **3.1.1 Rainfall and temperature**

174 The overall precipitation in the Beijing-Tianjin-Hebei region has exhibited a decreasing trend  
175 for over two decades, as shown in Figure 3. There is a negative correlation between precipitation  
176 and temperature, the correlation coefficient is -0.65. When the precipitation peaks, the temperature  
177 shows a dip.



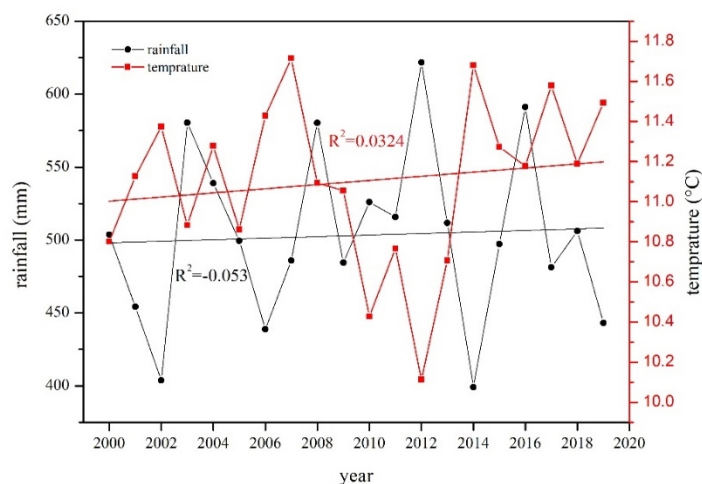

178

179

**Figure 3 Plot showing the interannual variation trend of rainfall-temperature**

### 180 3.1.2 Wind speed, radiation, and relative humidity

181 From the analysis of the multi-year change from the past 20 years in the Beijing-Tianjin-Hebei  
182 region, the wind speed has shown a decreasing trend. From 2000 to the present, the multi-year  
183 average wind speed was approximately 2.18 m/s. In 2008, the minimum value was 2.05 m/s. The  
184 overall range of radiation showed smooth variations, with increasing and decreasing trends in some  
185 years; the overall relative humidity showed a downward trend, with a relative humidity change trend  
186 ( $R^2$ ) of 0.359, as shown in Figure 4(c). Analyzed from the spatial change trend, the wind speed was  
187 higher in the northern part of the study area, and lower in the transition area between the plain and  
188 the mountainous regions. When it reached the southeastern plain, the wind speed gradually  
189 increased in the coastal zone, as shown in Figure 5(a), and the humidity gradually increased from  
190 the northwest to the southeast. The relative humidity in the hilly area was lower than that of the  
191 plain area, and high in the southernmost part of the study area, as shown in Figure 5(b). The average  
192 radiation hours were higher in the northwest mountainous area. The spatial radiation variation was  
193 high in the Southeast Plain, and relatively low in the southernmost part of the study area, as shown  
194 in Figure 5(c). Hence, it can be concluded that relative humidity and radiation are inversely  
195 correlated in space; that is, areas with high relative humidity have low radiation, and areas with low  
196 relative humidity have high radiation.

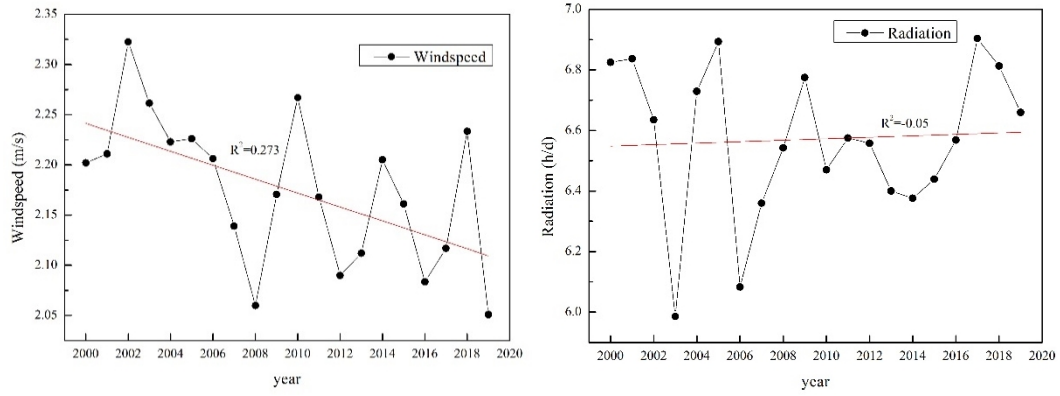

197

198

(a)

(b)

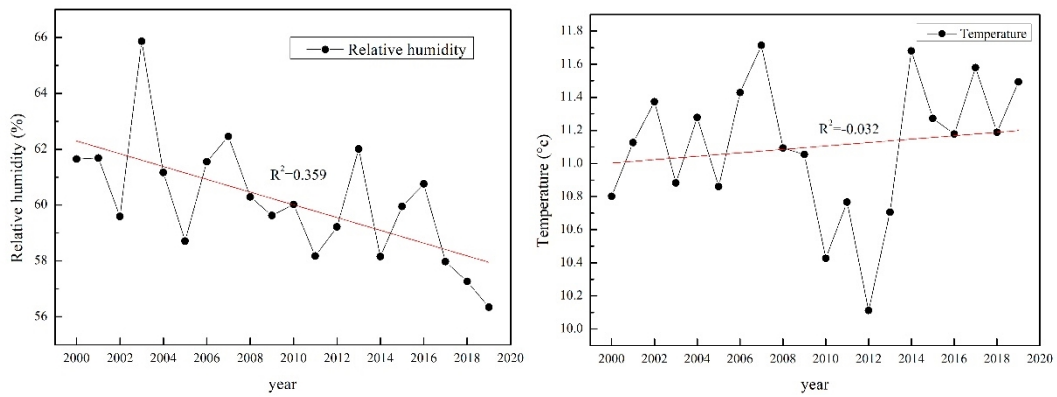

199

200

(c)

(d)

201 Figure 4 Plot showing the interannual variation trends of (a) wind speed, (b) radiation, (c) relative humidity,

202

and (d) temperature

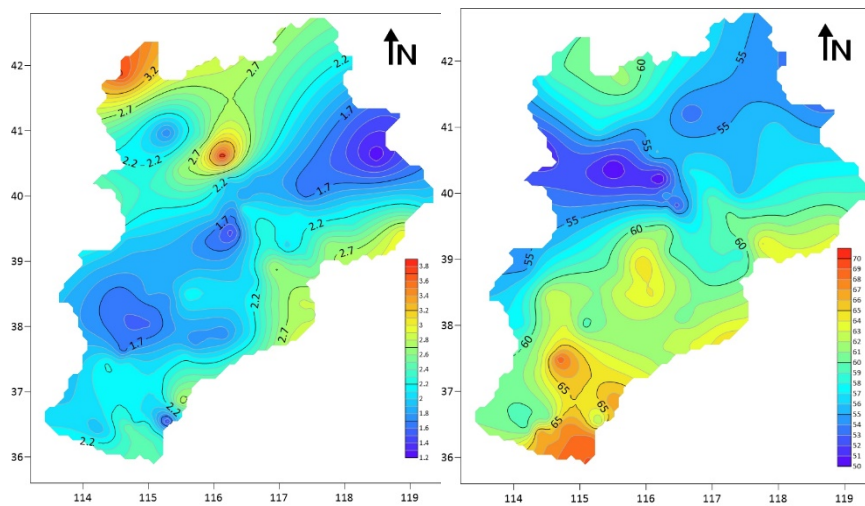

203

204

(a) Spatial variation in wind speed (b) Spatial variation in relative humidity

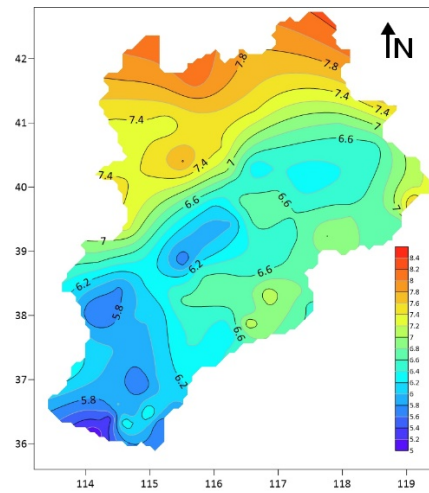

205

206

(c) Spatial variation in radiation law

207

Figure 5 Map showing the characteristic analysis of the meteorological factors

### 208 3.2 Distribution characteristics of potential evapotranspiration

209 Based on the maximum and minimum temperatures, relative humidity, solar radiation, wind  
210 speed, and other data from 80 meteorological stations in the Beijing-Tianjin-Hebei region, the  
211 potential evapotranspiration of the growth period was calculated using the FAO-98 procedure. The  
212 interannual variation of the potential evapotranspiration from 2000 to 2019 is shown in Figure 6.  
213 The plot of potential evapotranspiration in the region showed an overall upward trend that declined  
214 in certain years. For example, the potential evapotranspiration reached a minimum of 2.82.

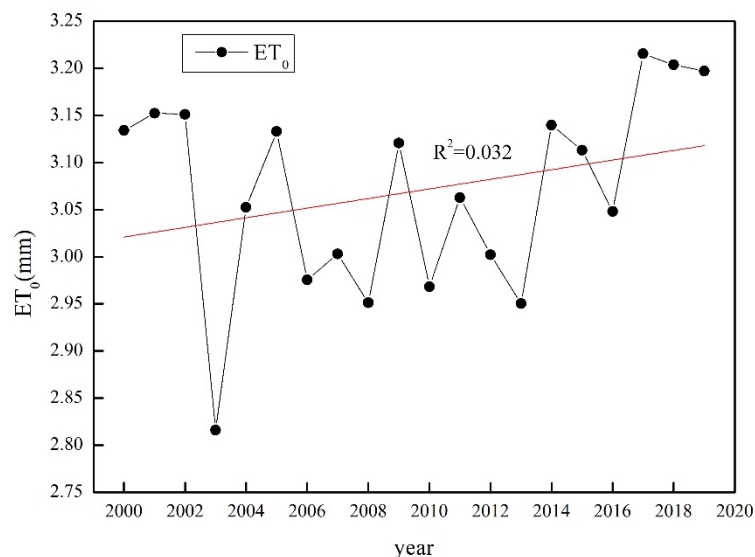

215

216 Figure 6 Plot showing the interannual variation of potential evapotranspiration in the growth period

### 217 3.3 Distribution characteristics of effective precipitation

218 The interannual and spatial variations of effective precipitation in the Beijing-Tianjin-Hebei

219 region from 2000 to 2019 were drawn, using the ten-year scale data of effective precipitation from  
220 80 stations, as shown in Figure 7.

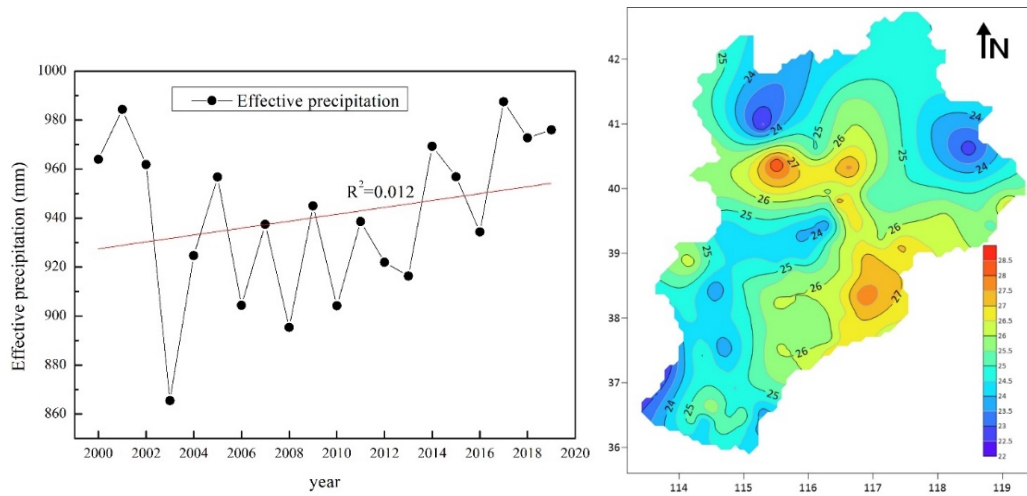

221  
222 (a) Plot showing the interannual variation of effective precipitation from 2000 to 2019 (b) Map showing the  
223 spatial distribution of average effective precipitation from 2000 to 2019

224 **Figure 7 Distribution characteristics of effective precipitation in Beijing-Tianjin-Hebei region**

225 It can be concluded from the figure that the effective precipitation in the Beijing-Tianjin-Hebei  
226 region shows an upward trend. From the spatial distribution data of the 10-day average effective  
227 precipitation in the Beijing-Tianjin-Hebei region, obvious differences in the effective precipitation  
228 in the study area can be observed. In 2000, the effective precipitation was high in the eastern plains  
229 and relatively low in the northwest mountainous areas. In 2005, the effective precipitation at the  
230 boundary between mountains and plains was significantly low. By 2019, the Beijing-Tianjin-Hebei  
231 region had different years. The ten-day average effective precipitation was considerably high in the  
232 eastern plain.

## 234 3.4 Analysis of irrigation water requirement

### 235 3.4.1 Analysis of the change characteristics

236 The changes in the irrigation water requirement of wheat at 80 sites from 2000 to 2019 were  
237 analyzed as shown in Figure 8(a). The overall trend of the plot showing irrigation water requirement  
238 of wheat in the study area is flat for most years. Fluctuations can be seen in 2002, 2006, and 2014,  
239 when the irrigation water requirement was relatively high or low. Figure 8(b) shows uneven spatial  
240 distribution of irrigation water requirement, that is high in the eastern plain and relatively low in the  
241 northwest mountainous area.

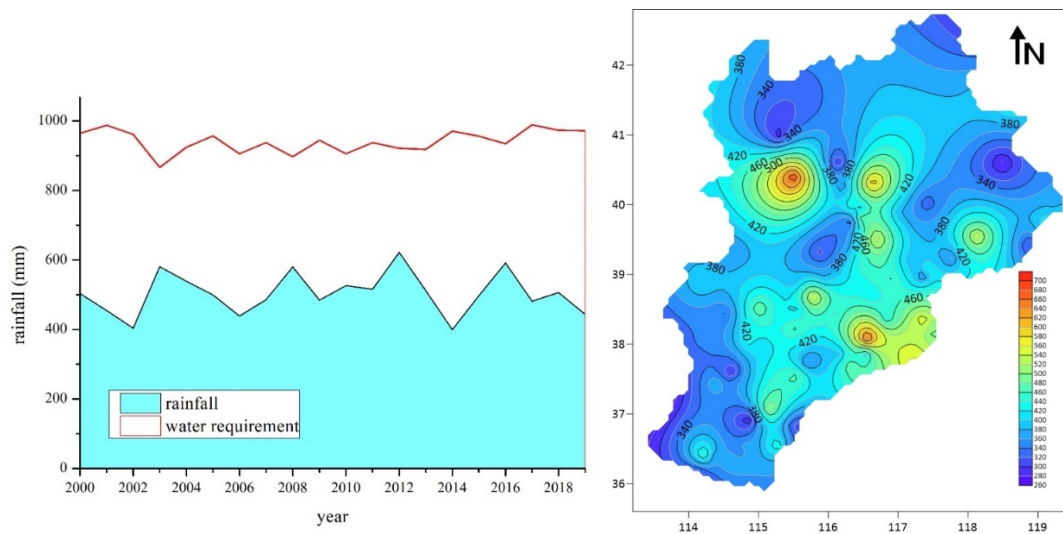

242

243 (a) Plot showing the interannual change in irrigation water requirement from 2000 to 2019

243

244

244 (b) Map showing the spatial change in average irrigation water requirement from 2000 to 2019

245 **Figure 8 Distribution characteristics of irrigation water requirement in Beijing-Tianjin-Hebei region**

### 246 3.4.2 Correlation analysis

247 The radar chart was used to analyze the changes in irrigation water requirement of wheat from  
248 2000 to 2019, as shown in Figure 9. It can be clearly seen from the shape of the chart that irrigation  
249 water requirement in the study area is closest to potential evapotranspiration. However, for  
250 individual years, wind speed, relative humidity, and radiation contributions were different. The  
251 irrigation water requirement shows positively correlation with potential evapotranspiration, wind  
252 speed and radiation changes. The radar chart of the multi-year changes of different meteorological  
253 factors in the study area, showed that the overall change in irrigation water requirement has the  
254 highest correlation with potential evapotranspiration. However, for individual years, wind speed,  
255 relative humidity, and radiation were the common influencing factors affecting regional irrigation

256 water requirement.

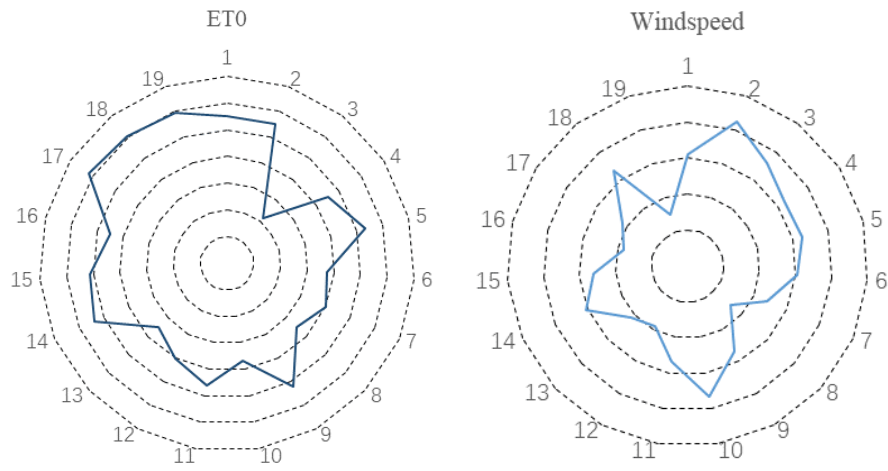

257

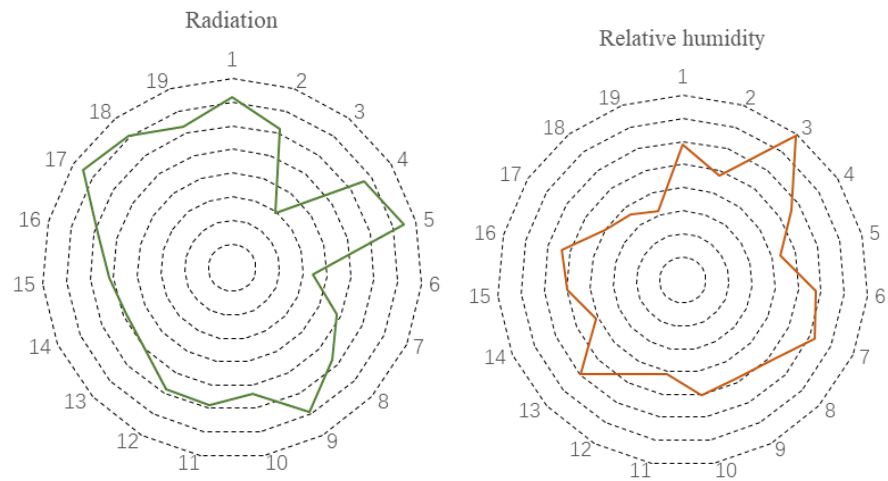

258

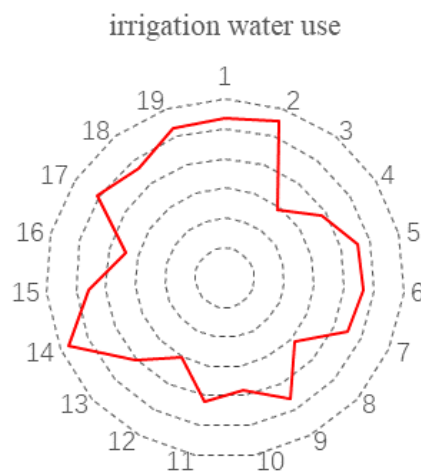

259

260

**Figure 9 Radar chart showing changes in meteorological factors from 2000 to 2019**

261

## 262 **4. Conclusion and discussion**

### 263 **4.1 Conclusion**

264 (1) The annual average precipitation, average wind speed, and average relative humidity in the  
265 Beijing-Tianjin-Hebei region show a general downward trend, while the annual average temperature  
266 shows an upward trend. Relative humidity and radiation show negative spatial correlation, that is,  
267 areas with high relative humidity have low radiation, and vice versa.

268 (2) The irrigation water requirement of wheat in the Beijing-Tianjin-Hebei region gradually  
269 decreases spatially from north to south and from east to west. The temporal variation in irrigation  
270 water requirement in the eastern and western regions shows an opposite trend. The eastern region  
271 shows a gradually increasing trend, while the area is decreasing.

272 (3) Meteorological elements have significant impact on irrigation water requirement. They  
273 show negative correlation with irrigation water requirement, potential evapotranspiration, effective  
274 precipitation, and relative humidity, and positive correlation with sunshine hours, average  
275 temperature, and wind speed. The overall change in irrigation water requirement has the highest  
276 correlation with potential evapotranspiration. However, for yearly variations in regional irrigation  
277 water requirement, wind speed, relative humidity, and radiation are the common influencing factors.

### 278 **4.2 Discussion**

279 Irrigation water requirement is affected by complex factors. This study considers the  
280 meteorological factors influencing irrigation water requirement in different growth periods of wheat.  
281 Potential evapotranspiration and effective precipitation are observed to be the most important  
282 indicators that affect irrigation water requirement during the growth period. The effective  
283 precipitation during the wheat growth period in the Beijing-Tianjin-Hebei region has increased in  
284 the past two decades. This is contrary to the decreasing precipitation trend in the study area, as  
285 precipitation in the key growth periods of wheat has significantly increased since the 21st century.  
286 The study indicates that irrigation water requirement is affected by several factors at different  
287 growth stages of crops. A decrease in sunlight reduces the amount of energy reaching the surface of  
288 the Earth, resulting in a decrease in ground evaporation. Furthermore, a decrease in wind speed  
289 reduces the rate of water exchange between the air and the soil, affecting the soil moisture balance.

290 Most previous studies are based on the overall growth period of crops. However, this study

291 focuses on each growth stage of the crop, in combination with meteorological elements and growth  
292 period data for comprehensive and accurate analyses. In future studies, these results of irrigation  
293 water requirement may be combined with groundwater extraction and artificial channel water  
294 transfer in the study area to increase crop yield.

295 Estimating the irrigation water requirement during the growth period of wheat is conducive to  
296 the adoption of targeted measures to effectively respond to climate change and increase wheat  
297 production. Water can thus be supplemented on time during the critical water requirement period,  
298 improving water use efficiency and crop yield.

### 299 **Availability of data**

300 In this paper, we mainly used the stations data, wheat growth data data to support the findings  
301 of this study were supplied by the National Meteorological Information Center (<http://data.cma.cn/>)  
302 under license and so cannot be made freely available.

### 303 **Author contributions**

304 Xu Chengcheng and Lu Chuiyu designed research; Lu Chuiyu performed research; Xu  
305 Chengcheng analyzed data; Wang Jianhhua contributed to interpretation of results; Lu Chuiyu  
306 contributed to algorithm development; and Xu Chengcheng wrote the paper.

### 307 **Competing interests**

308 This manuscript has not been published or presented elsewhere in part or in entirety and is not  
309 under consideration by another journal. We have read and understood your journal's policies, and  
310 we believe that neither the manuscript nor the study violates any of these. There are no conflicts of  
311 interest to declare.

### 312 **Acknowledgments**

313 We acknowledge reviewers and editors for their patient and valuable advice on improving the  
314 quality of this paper and teaching us how to write higher quality papers. We thank our partners from  
315 Anhui University of Science and Technology and China Institute of Water Resources and  
316 Hydropower Research for their collaborative support during the studies. Financial support for this  
317 work was provided by the National Key Research and Development Program of China (grant No.



318 2016YFC0401404), Applied Technology Research and Development Program of Heilongjiang  
319 Province (grant No.GA19C005), National Key Research and Development Program  
320 (2016YFC0401300), and the National Science Fund for Distinguished Young Scholars (51625904).

## 321 **References**

322 Ahmad, R., Zulfiqar, M. (2019). Climate Change-Farmers' Perception, Adaptation and Impact on  
323 Agriculture in the Lakki Marwat District of Khyber Pakhtunkhwa. *Sarhad Journal of*  
324 *Agriculture*, 35(3), 880–889. <https://doi.org/10.17582/journal.sja/2019/35.3.880.889>

325 Allen, R.G, Pereira, L.S, Raes, D, et al. Crop evapotranspiration: Guidelines for computing crop  
326 water requirements-FAO Irrigation and Drainage Paper 56. Rome: Food and Agriculture  
327 Organization of the United Nations, 1998

328 Bi Yanjie, Zhao Jing, Zhao Yong, Xiao Weihua, & Meng Fanjin. (2020). Spatial-temporal variation  
329 characteristics and attribution analysis of potential evapotranspiration in Beijing-Tianjin-  
330 Hebei region. *Transactions of the Chinese Society of Agricultural Engineering*, 36(5), 130–140.  
331 <https://doi.org/10.11975/j.issn.1002-6819.2020.05.015>

332 Calzadilla, A., Rehdanz, K., Betts, R., Falloon, P., Wiltshire, A., & Tol, R. (2013). Climate change  
333 impacts on global agriculture. *Climatic Change*, 120(1/2), 357–374.  
334 <https://doi.org/10.1007/s10584-013-0822-4>

335 Chen, C., Greene, A. M., Robertson, A. W., Baethgen, W. E., & Eamus, D. (2013). Scenario development  
336 for estimating potential climate change impacts on crop production in the North China  
337 Plain. *International Journal of Climatology*, 33(15), 3124–3140. <https://doi.org/10.1002/joc.3648>

338 Dong, Z., Pan, Z., An, P., Wang, J., Zhang, J., Zhang, J., Pan, Y., Huang, L., Zhao, H., Han, G., Fan, D.,  
339 Wu, D., He, Q., & Pan, X. (2019). A quantitative method for determining the impact threshold of  
340 climate change for agriculture. *Theoretical & Applied Climatology*, 135(1–2), 425–431.  
341 <https://doi.org/10.1007/s00704-018-2397-5>

342 Geng, X., Wang, F., Ren, W., & Hao, Z. (2019). Climate Change Impacts on Wheat Yield in  
343 Northern China. *Advances in Meteorology*, 1–12. <https://doi.org/10.1155/2019/2767018>

344 Guo, J., Huang, G., Wang, X., & Lu, C. (2020). Projections of daily mean surface temperature over the  
345 Beijing-Tianjin-Hebei region through a stepwise cluster downscaling method. *Theoretical &*  
346 *Applied Climatology*, 141(1/2), 71–86. <https://doi.org/10.1007/s00704-020-03172-w>

- 347 Guo, X., Ren, D., & Li, C. (2020). Study on the problem of wind power curtailment in Beijing-Tianjin-  
348 Hebei based on risk-return. *Energy Sources Part A: Recovery, Utilization & Environmental*  
349 *Effects*, 42(21), 2632–2647. <https://doi.org/10.1080/15567036.2019.1618977>
- 350 Iglesias, A., Quiroga, S., Moneo, M., & Garrote, L. (2012). From climate change impacts to the  
351 development of adaptation strategies: Challenges for agriculture in Europe. *Climatic*  
352 *Change*, 112(1), 143–168. <https://doi.org/10.1007/s10584-011-0344-x>
- 353 IPCC 1990. *Climate Change and Impact 1990*. Cambridge University Press, Cambridge.
- 354 IPCC 1996. *Climate Change 1995. Impacts, Adaptation, and Mitigation*. Cambridge University  
355 Press, Cambridge.
- 356 IPCC 2001. *Climate Change 2001. Impacts, Adaptation, and Vulnerability*. Cambridge University  
357 Press, Cambridge.
- 358 IPCC 2007. *Climate change 2007: the physical science basis*. Cambridge University Press,  
359 Cambridge.
- 360 IPCC 2013. *Climate change 2013: the physical science basis*. Cambridge University Press,  
361 Cambridge.
- 362 Ju, H., Velde, M., Lin, E., Xiong, W., & Li, Y. (2013). The impacts of climate change on agricultural  
363 production systems in China. *Climatic Change*, 120(1/2), 313–324.  
364 <https://doi.org/10.1007/s10584-013-0803-7>
- 365 Lecina, S., Martínez-Cob, A., Pérez, P. J., Villalobos, F. J., & Baselga, J. J. (2003). Fixed versus  
366 variable bulk canopy resistance for reference evapotranspiration estimation using the Penman–  
367 Monteith equation under semiarid conditions. *Agricultural Water Management*, 60(3), 181.  
368 [https://doi.org/10.1016/S0378-3774\(02\)00174-9](https://doi.org/10.1016/S0378-3774(02)00174-9)
- 369 Liu, J., Folberth, C., Yang, H., Röckström, J., Abbaspour, K., & Zehnder, A. J. B. (2013). A Global and  
370 Spatially Explicit Assessment of Climate Change Impacts on Crop Production and Consumptive  
371 Water Use. *PLoS ONE*, 8(2), 1–13. <https://doi.org/10.1371/journal.pone.0057750>
- 372 Lv, Z., Liu, X., Cao, W., & Zhu, Y. (2013). Climate change impacts on regional wheat production in  
373 main wheat production regions of China. *Agricultural & Forest Meteorology*, 171–172, 234–248.  
374 <https://doi.org/10.1016/j.agrformet.2012.12.008>
- 375 Mayank, Parveen, S., Sharma, A., & Mohit. (2019). Perception about changes in Climate and Potential

- 376 impact of such changes on Ecosystems, Biodiversity, Agriculture and Livelihoods at local level in  
377 Jhansi district of Bundelkhand region of Uttar Pradesh. *International Journal of Pharmacy & Life*  
378 *Sciences*, 10(4), 6198–6215.
- 379 McBride, L. A., P. Hope, A., Canty, T. P., Bennett, B. F., Tribett, W. R., & Salawitch, R. J. (2020).  
380 Comparison of CMIP6 Historical Climate Simulations and Future Projected Warming to an  
381 Empirical Model of Global Climate. *Earth System Dynamics Discussions*, 1–59.  
382 <https://doi.org/10.5194/esd-2020-67>
- 383 Men, B., Wu, Z., Liu, H., Tian, W., & Zhao, Y. (2020). Spatio-temporal Analysis of Precipitation and  
384 Temperature: A Case Study Over the Beijing–Tianjin–Hebei Region, China. *Pure & Applied*  
385 *Geophysics*, 177(7), 3527–3541. <https://doi.org/10.1007/s00024-019-02400-3>
- 386 Noufé, D., Mahé, G., Kamagaté, B., Servat, É., Goula Bi Tié, A., & Savané, I. (2015). Climate change  
387 impact on agricultural production: the case of Comoe River basin in Ivory Coast. *Hydrological*  
388 *Sciences Journal/Journal Des Sciences Hydrologiques*, 60(11), 1972–1983.  
389 <https://doi.org/10.1080/02626667.2015.1032293>
- 390 Pons, C., Voß, A., Schweiger, R., & Müller, C. (2020). Effects of drought and mycorrhiza on wheat  
391 and aphid infestation. *Ecology & Evolution* (20457758), 10(19), 10481–10491.  
392 <https://doi.org/10.1002/ece3.6703>
- 393 Seo, S. N. (2013). An essay on the impact of climate change on US agriculture: weather fluctuations,  
394 climatic shifts, and adaptation strategies. *Climatic Change*, 121(2), 115–124.  
395 <https://doi.org/10.1007/s10584-013-0839-8>
- 396 Schönhart, M., Schauppenlehner, T., Kuttner, M., Kirchner, M., & Schmid, E. (2016). Climate change  
397 impacts on farm production, landscape appearance, and the environment: Policy scenario results  
398 from an integrated field-farm-landscape model in Austria. *Agricultural Systems*, 145, 39–50.  
399 <https://doi.org/10.1016/j.agsy.2016.02.008>
- 400 Song, X., Zhang, C., Zhang, J., Zou, X., Mo, Y., & Tian, Y. (2020). Potential linkages of precipitation  
401 extremes in Beijing-Tianjin-Hebei region, China, with large-scale climate patterns using wavelet-  
402 based approaches. *Theoretical and Applied Climatology*, 141(3/4), 1251–1269.  
403 <https://doi.org/10.1007/s00704-020-03247-8>
- 404 Sun, S., Wu, P., Wang, Y., Zhao, X., Liu, J., & Zhang, X. (2013). The impacts of interannual climate

- 405 variability and agricultural inputs on water footprint of crop production in an irrigation district of  
406 China. *Science of the Total Environment*, 444, 498–507.  
407 <https://doi.org/10.1016/j.scitotenv.2012.12.016>
- 408 Van der Geest, K., Warner, K. (2020). Loss and damage in the IPCC Fifth Assessment Report  
409 (Working Group II): a text-mining analysis. *Climate Policy (Earthscan)*, 20(6), 729–742.  
410 <https://doi.org/10.1080/14693062.2019.1704678>
- 411 Wang, G., Li, T., Zhang, W., & Yu, Y. (2014). Impacts of Agricultural Management and Climate Change  
412 on Future Soil Organic Carbon Dynamics in North China Plain. *PLoS ONE*, 9(4), 1–10.  
413 <https://doi.org/10.1371/journal.pone.0094827>
- 414 Wang, Z., Meng, C., Chen, J., & Chen, F. (2019). Risk Assessment of Crop Production Amid Climate  
415 Change Based on the Principle of Maximum Entropy: A Case Study of Wheat Production on the  
416 North China Plain. *International Journal of Plant Production*, 13(4), 275–284.  
417 <https://doi.org/10.1007/s42106-019-00053-9>
- 418 Weerathunga, W. A. M. T., Rajapaksa, G. (2020). The impact of elevated temperature and CO<sup>2</sup> on  
419 growth, physiological and immune responses of *Polypedates cruciger* (common hourglass tree  
420 frog). *Frontiers in Zoology*, 17(1), 1–25. <https://doi.org/10.1186/s12983-019-0348-3>
- 421 Zhang, B., Fan, Z., Du, Z., Zheng, J., Luo, J., Wang, N., & Wang, Q. (2020). A Geomorphological  
422 Regionalization using the Upscaled DEM: the Beijing-Tianjin-Hebei Area, China Case  
423 Study. *Scientific Reports*, 10(1), 1–12. <https://doi.org/10.1038/s41598-020-66993-9>
- 424 Zhenyu Han, Ying Shi, Jia Wu. (2019). Combined Dynamical and Statistical Downscaling for High-  
425 Resolution Projections of Multiple Climate Variables in the Beijing–Tianjin–Hebei Region of  
426 China. *Journal of Applied Meteorology and Climatology*, 58(11), 2387–2403.  
427 <https://doi.org/10.1175/JAMC-D-19-0050.1>
- 428 Zhang, Q., Gu, X., Singh, V. P., Liu, L., & Kong, D. (2016). Flood-induced agricultural loss across China  
429 and impacts from climate indices. *Global & Planetary Change*, 139, 31–43.  
430 <https://doi.org/10.1016/j.gloplacha.2015.10.006>
